# Supplementary material
Source: MDPI journal article supplement (https://www.mdpi.com/2076-3417/14/9/3700)

## Article

# Novel Adamantane Derivatives: Synthesis, Cytotoxicity and Antimicrobial Properties

Łukasz Popiołek <sup>1\*</sup>, Wiktoria Janas <sup>1</sup>, Anna Hordyjewska <sup>2</sup> and Anna Biernasiuk <sup>3</sup>

<sup>1</sup> Department of Organic Chemistry, Faculty of Pharmacy, Medical University of Lublin, 4A Chodźki Street, 20-093 Lublin, Poland; lukasz.popiolek@umlub.pl (L.P.); 50556@student.umlub.pl (WJ);

<sup>2</sup> Department of Medicinal Chemistry, Faculty of Medical Sciences, Medical University of Lublin, 4A Chodźki Street, 20-093 Lublin, Poland; anna.hordyjewska@umlub.pl (A.H.);

<sup>3</sup> Department of Pharmaceutical Microbiology, Faculty of Pharmacy, Medical University of Lublin, 1 Chodźki Street, 20-093 Lublin, Poland; anna.biernasiuk@umlub.pl (A.B.);

\* Correspondence: lukasz.popiolek@umlub.pl; Tel: +48-81-448-72-43

## Supplementary Materials

### *Cytotoxicity*

#### List of figures:

**Figure S1.** The cell proliferation in % after 24h exposition on the compound **7** in L929 cell line

**Figure S2.** The cell proliferation in % after 24h exposition on the compound **10** in L929 cell line

**Figure S3.** The cell proliferation in % after 24h exposition on the compound **21** in L929 cell line

**Figure S4.** The cell proliferation in % after 48h exposition on the compound **7** in L929 cell line

**Figure S5.** The cell proliferation in % after 48h exposition on the compound **10** in L929 cell line

**Figure S6.** The cell proliferation in % after 48h exposition on the compound **21** in L929 cell line

**Figure S7.** The cell proliferation in % after 24h exposition on the compound **7** in A549 cell line

**Figure S8.** The cell proliferation in % after 24h exposition on the compound **10** in A549 cell line

**Figure S9.** The cell proliferation in % after 24h exposition on the compound **21** in A549 cell line

**Figure S10.** The cell proliferation in % after 48h exposition on the compound **7** in A549 cell line

**Figure S11.** The cell proliferation in % after 48h exposition on the compound **10** in A549 cell line

**Figure S12.** The cell proliferation in % after 48h exposition on the compound **21** in A549 cell line

**Figure S13.** The cell proliferation in % after 24h exposition on the compound **7** in T47D cell line

**Figure S14.** The cell proliferation in % after 24h exposition on the compound **10** in T47D cell line

**Figure S15.** The cell proliferation in % after 24h exposition on the compound **21** in T47D cell line

**Figure S16.** The cell proliferation in % after 48h exposition on the compound **7** in T47D cell line

**Figure S17.** The cell proliferation in % after 48h exposition on the compound **10** in T47D cell line

**Figure S18.** The cell proliferation in % after 48h exposition on the compound **21** in T47D cell line

**Figure S19.** The cell proliferation in % after 24h exposition on the compound **7** in HeLa cell line

**Figure S20.** The cell proliferation in % after 24h exposition on the compound **10** in HeLa cell line

**Figure S21.** The cell proliferation in % after 24h exposition on the compound **21** in HeLa cell line

**Figure S22.** The cell proliferation in % after 48h exposition on the compound **7** in HeLa cell line

**Figure S23.** The cell proliferation in % after 48h exposition on the compound **10** in HeLa cell line

**Figure S24.** The cell proliferation in % after 48h exposition on the compound **21** in HeLa cell line

**Figure S1.** The cell proliferation in % after 24h exposition on the compound 7 in L929 cell line

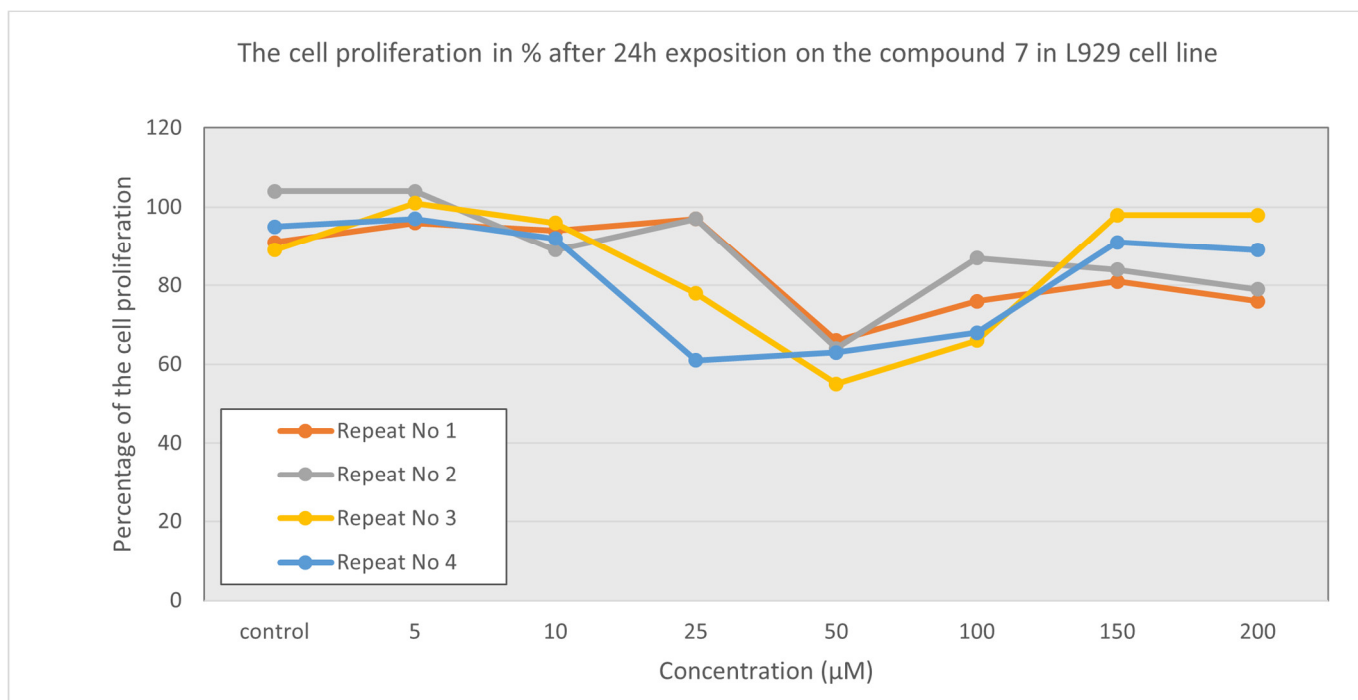

**Figure S2.** The cell proliferation in % after 24h exposition on the compound 10 in L929 cell line

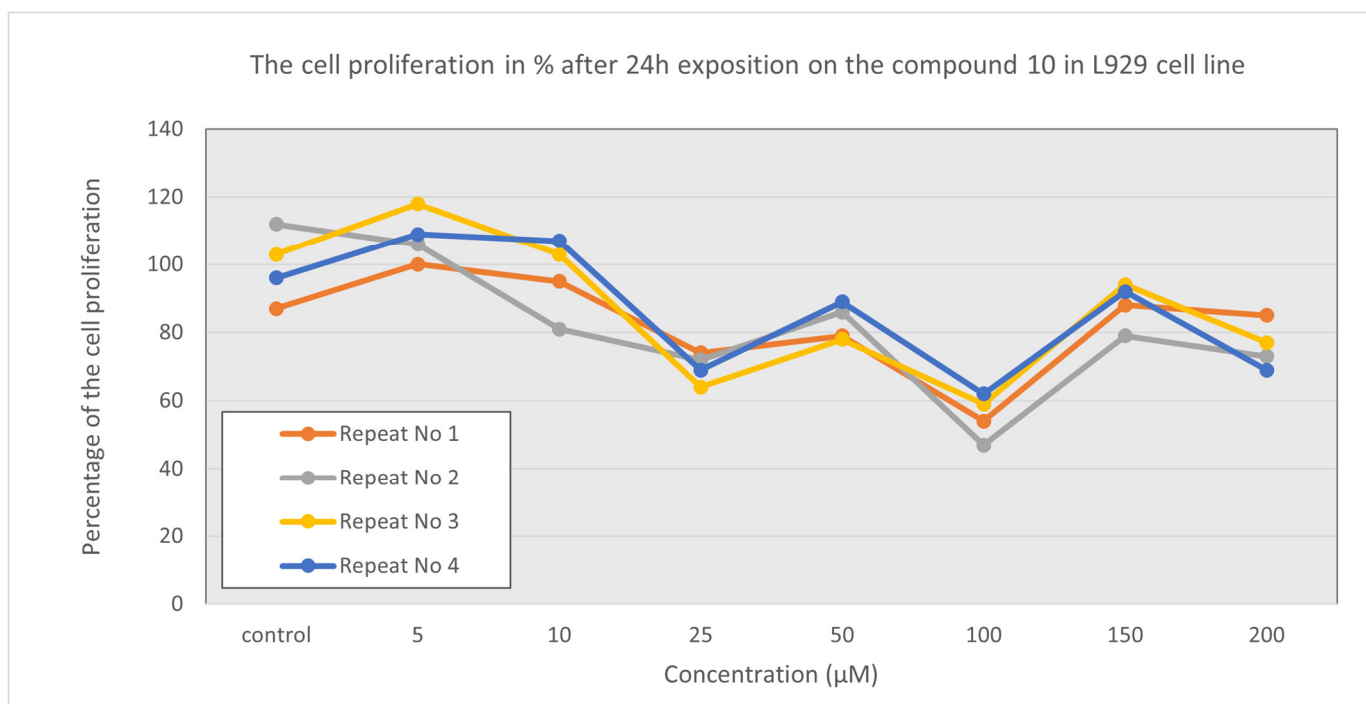

**Figure S3.** The cell proliferation in % after 24h exposition on the compound **21** in L929 cell line

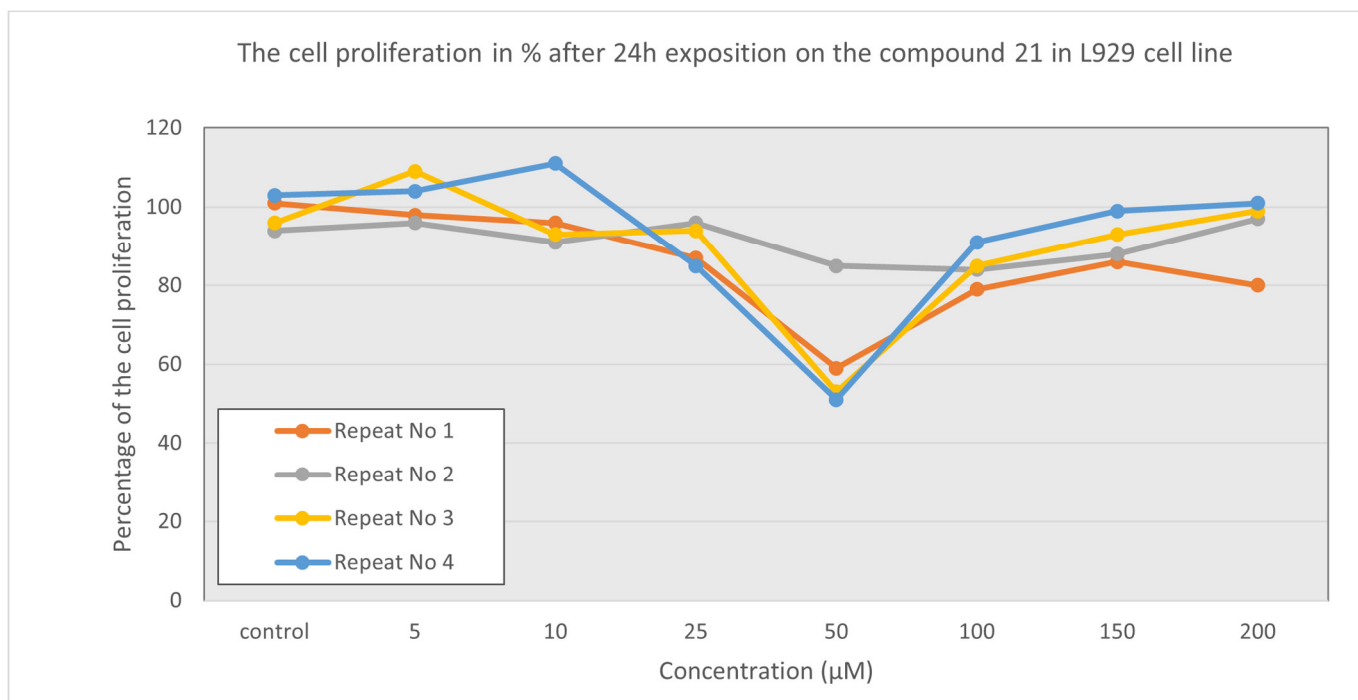

**Figure S4.** The cell proliferation in % after 48h exposition on the compound **7** in L929 cell line

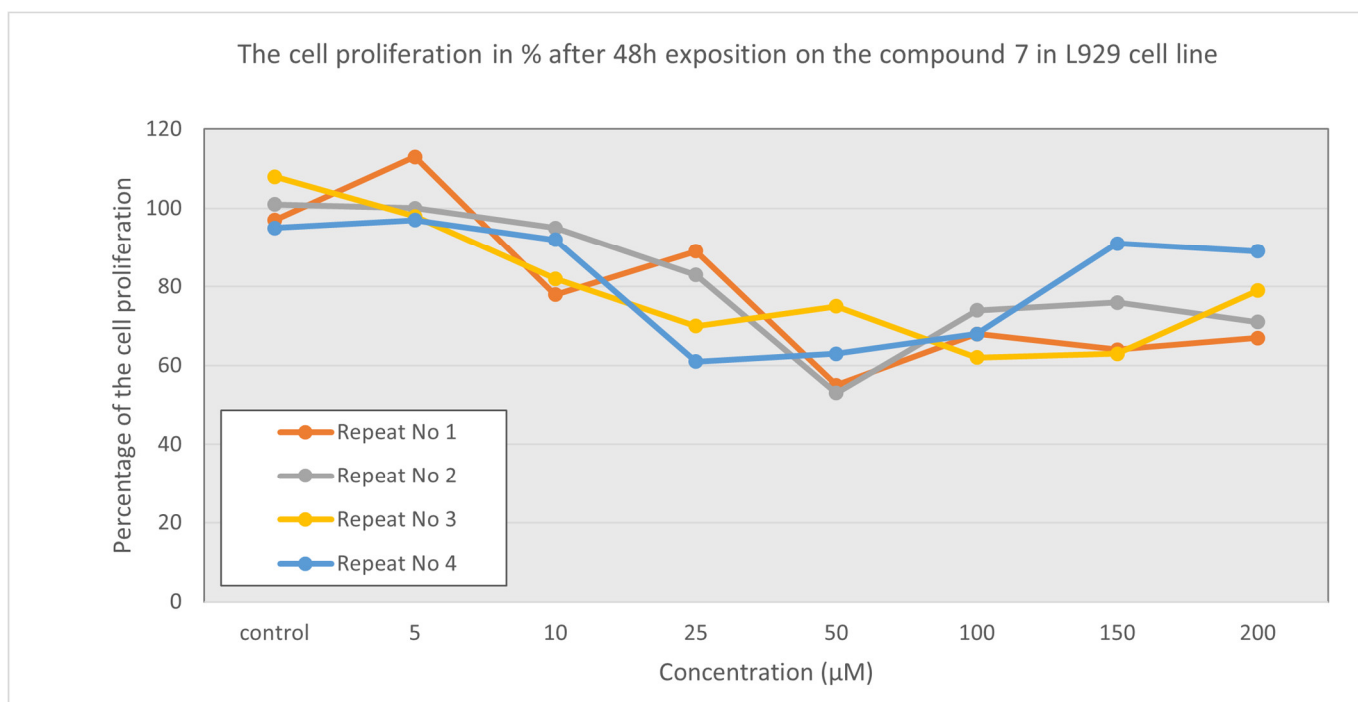

**Figure S5.** The cell proliferation in % after 48h exposition on the compound **10** in L929 cell line

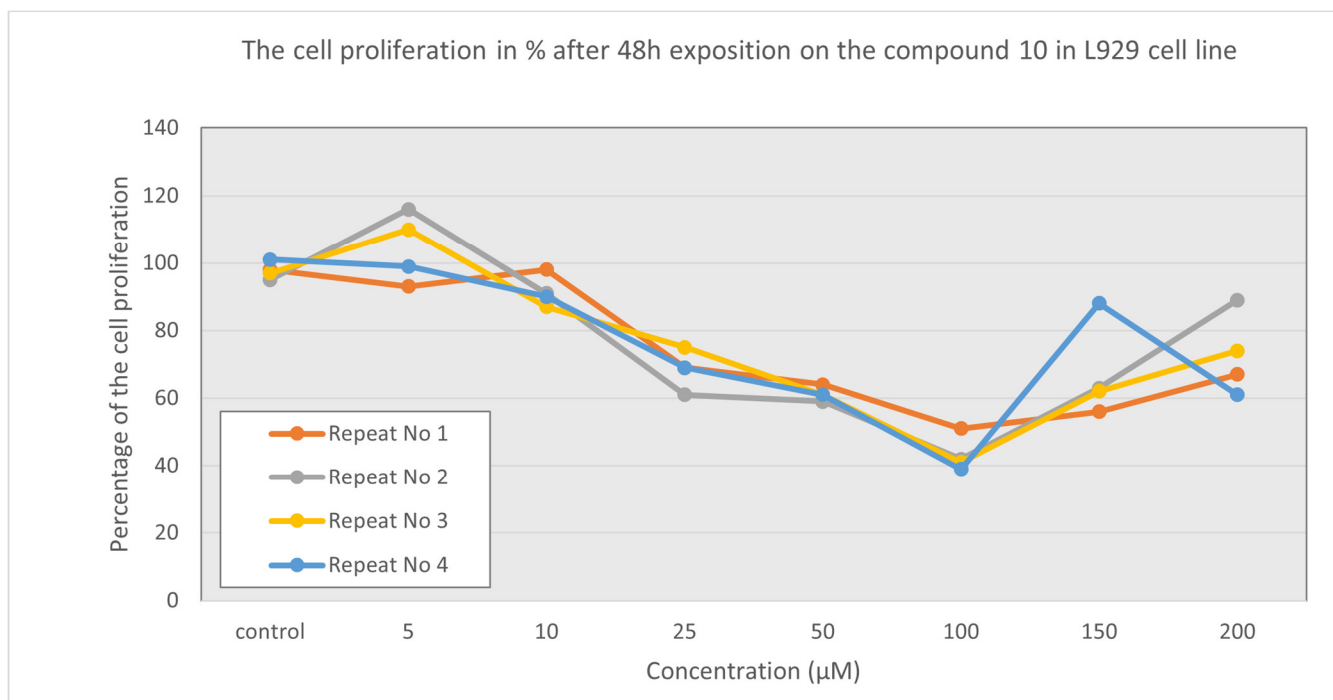

**Figure S6.** The cell proliferation in % after 48h exposition on the compound **21** in L929 cell line

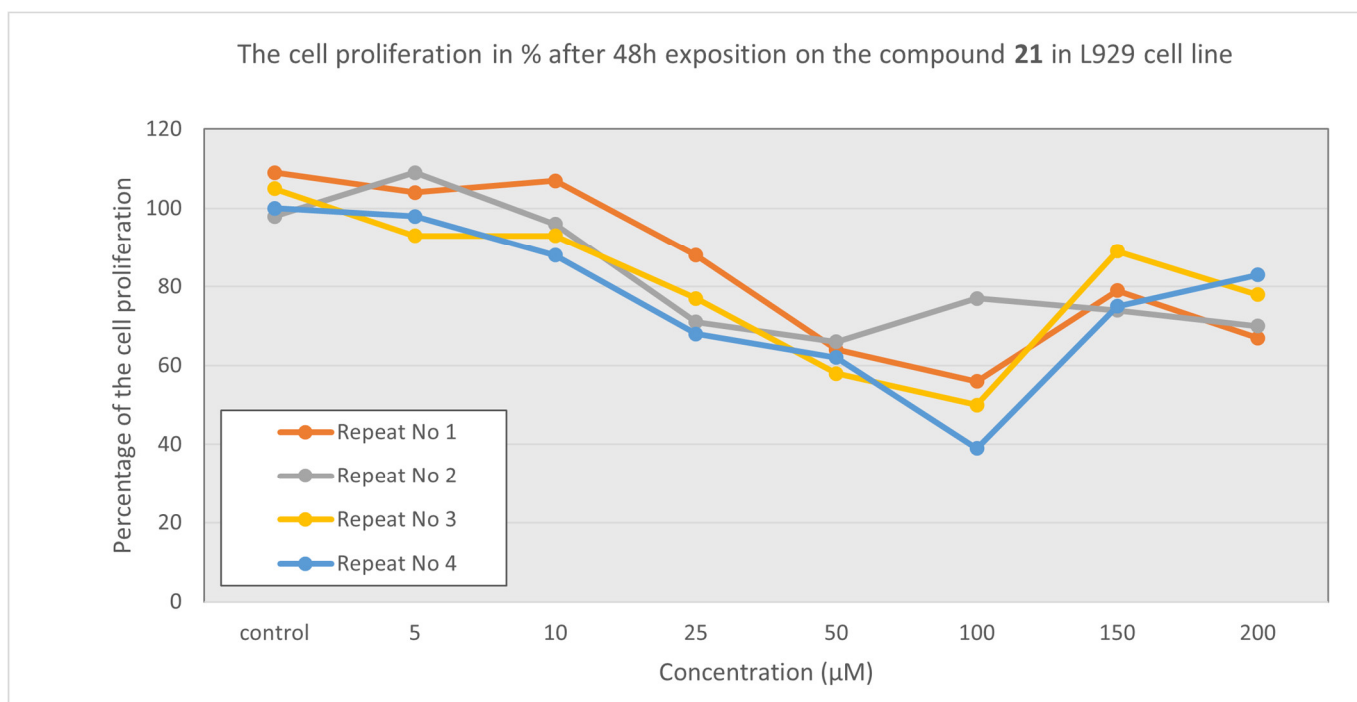

**Figure S7.** The cell proliferation in % after 24h exposition on the compound 7 in A549 cell line

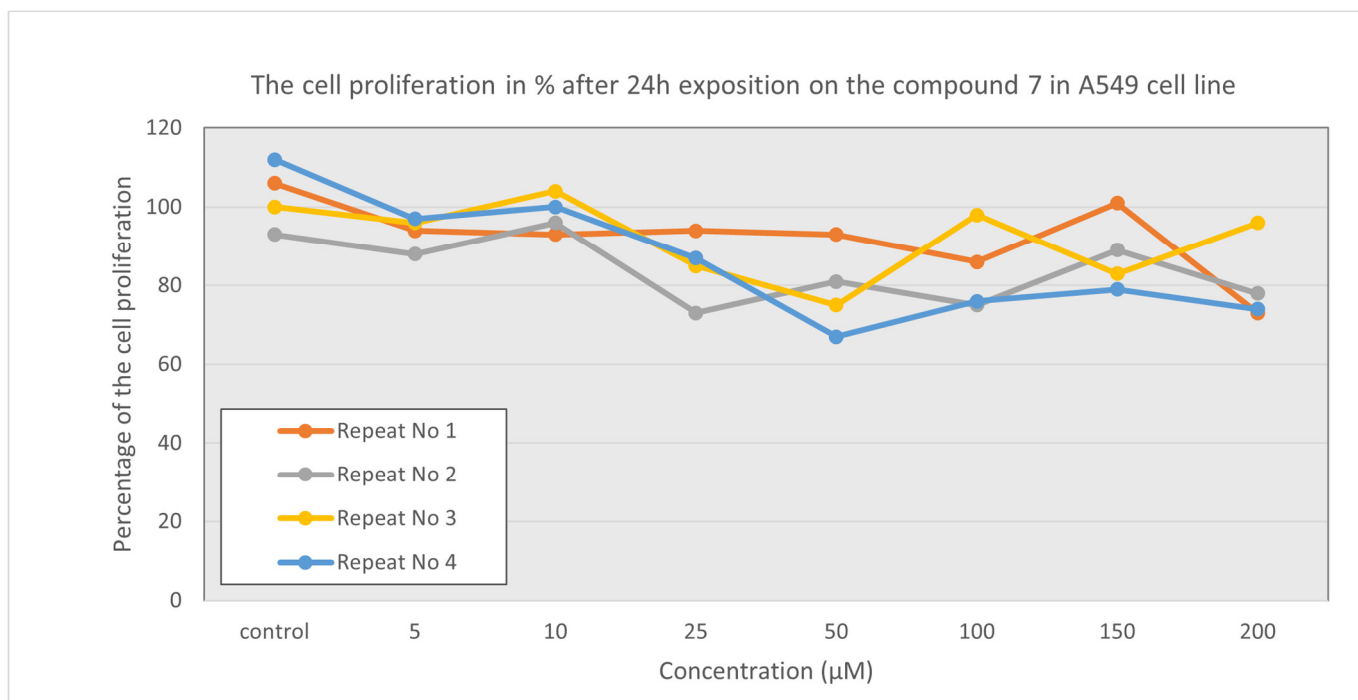

**Figure S8.** The cell proliferation in % after 24h exposition on the compound 10 in A549 cell line

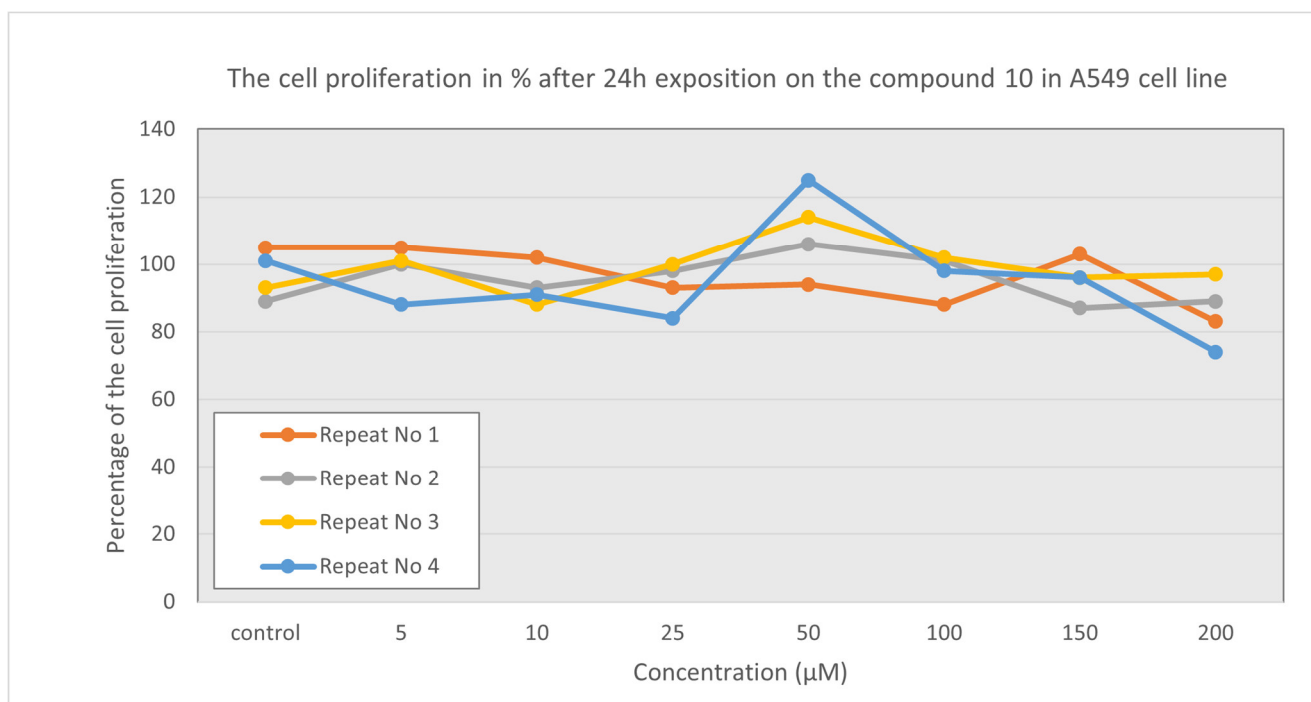

**Figure S9.** The cell proliferation in % after 24h exposition on the compound **21** in A549 cell line

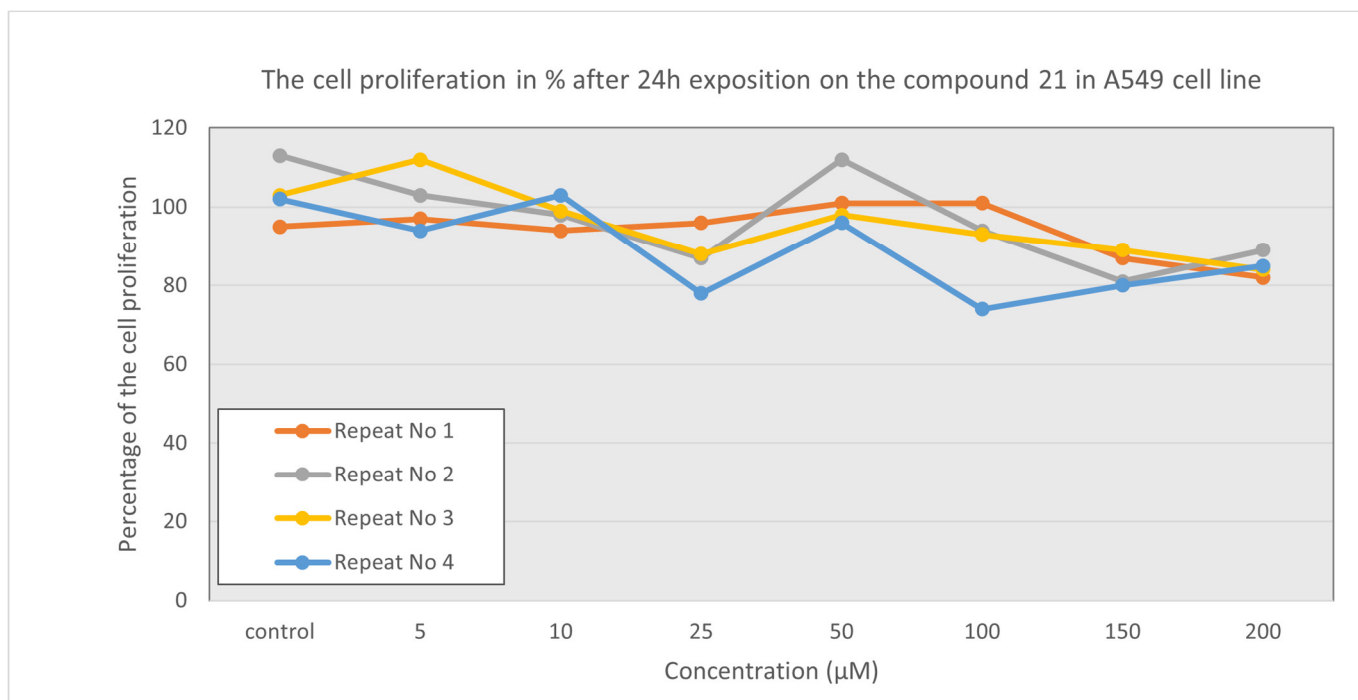

**Figure S10.** The cell proliferation in % after 48h exposition on the compound **7** in A549 cell line

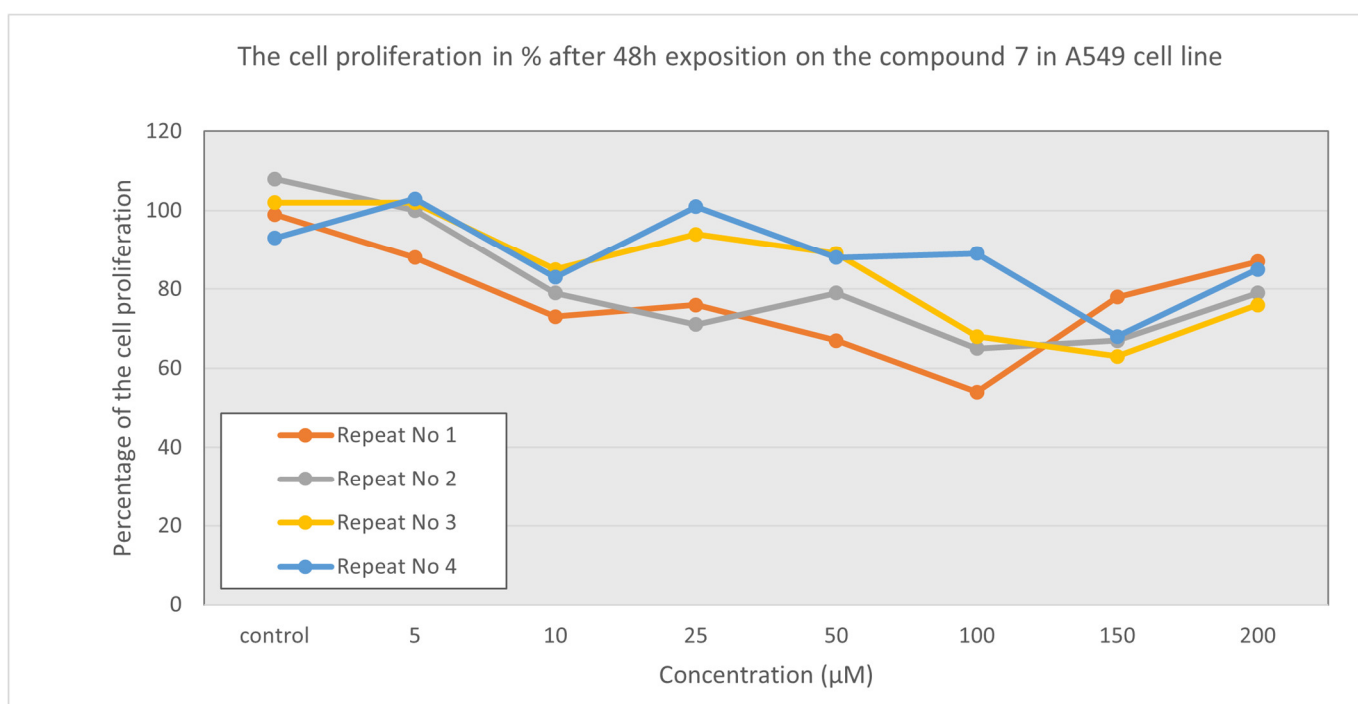

**Figure S11.** The cell proliferation in % after 48h exposition on the compound **10** in A549 cell line

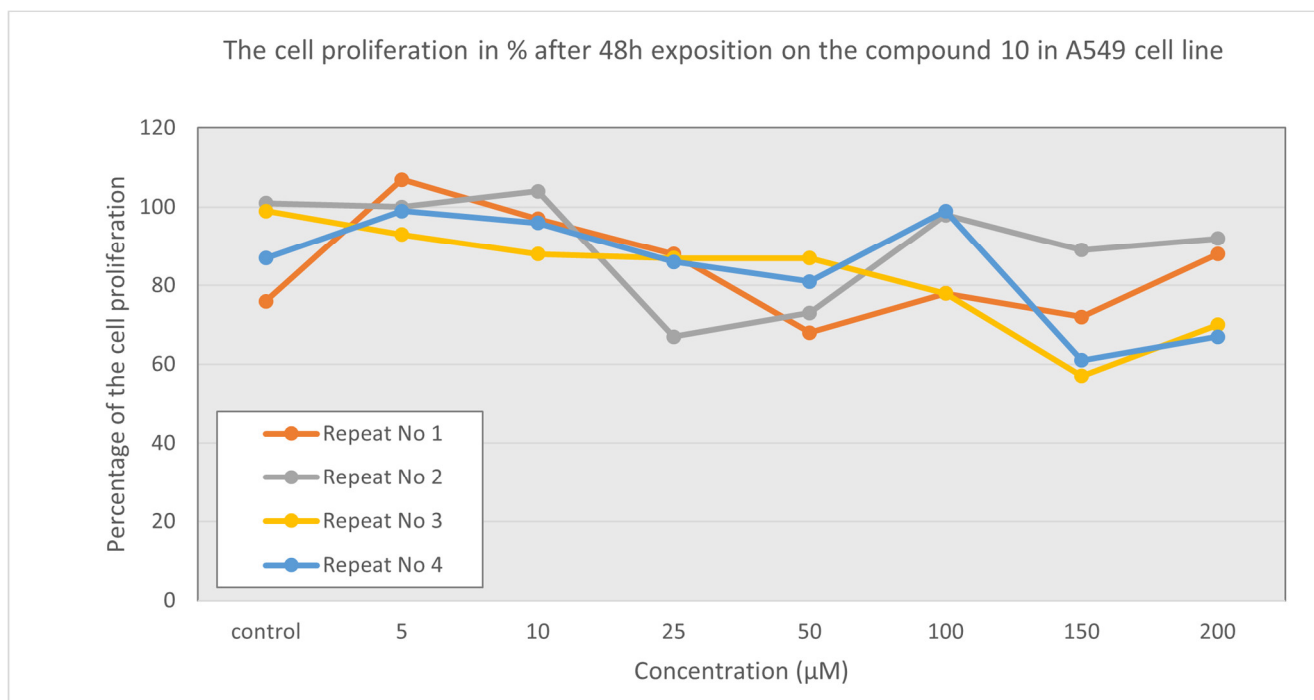

**Figure S12.** The cell proliferation in % after 48h exposition on the compound **21** in A549 cell line

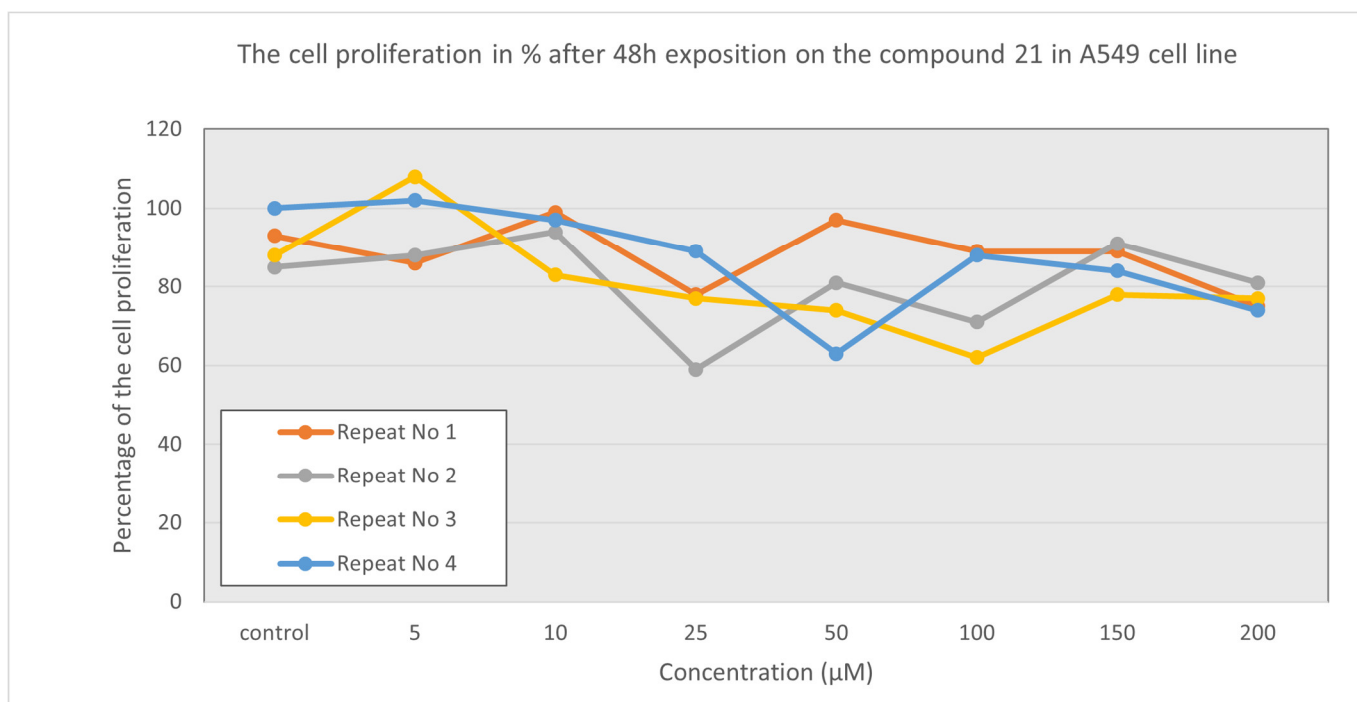

**Figure S13.** The cell proliferation in % after 24h exposition on the compound 7 in T47D cell line

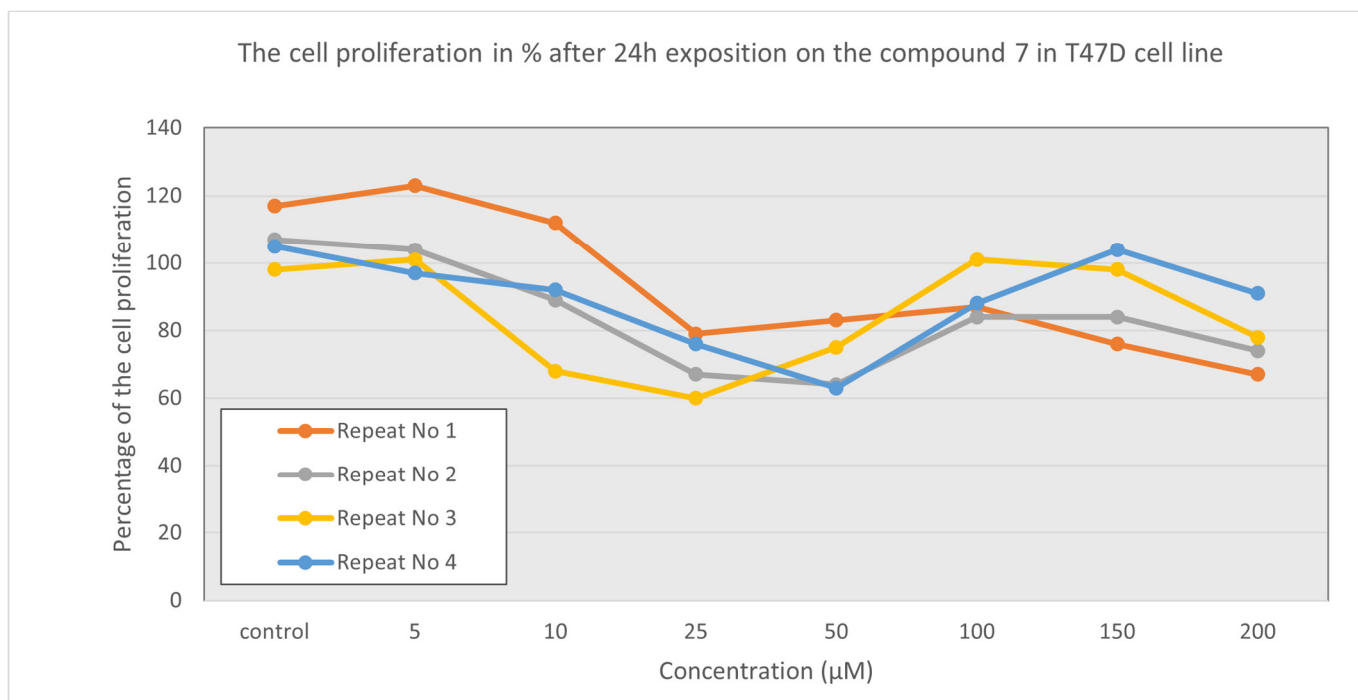

**Figure S14.** The cell proliferation in % after 24h exposition on the compound 10 in T47D cell line

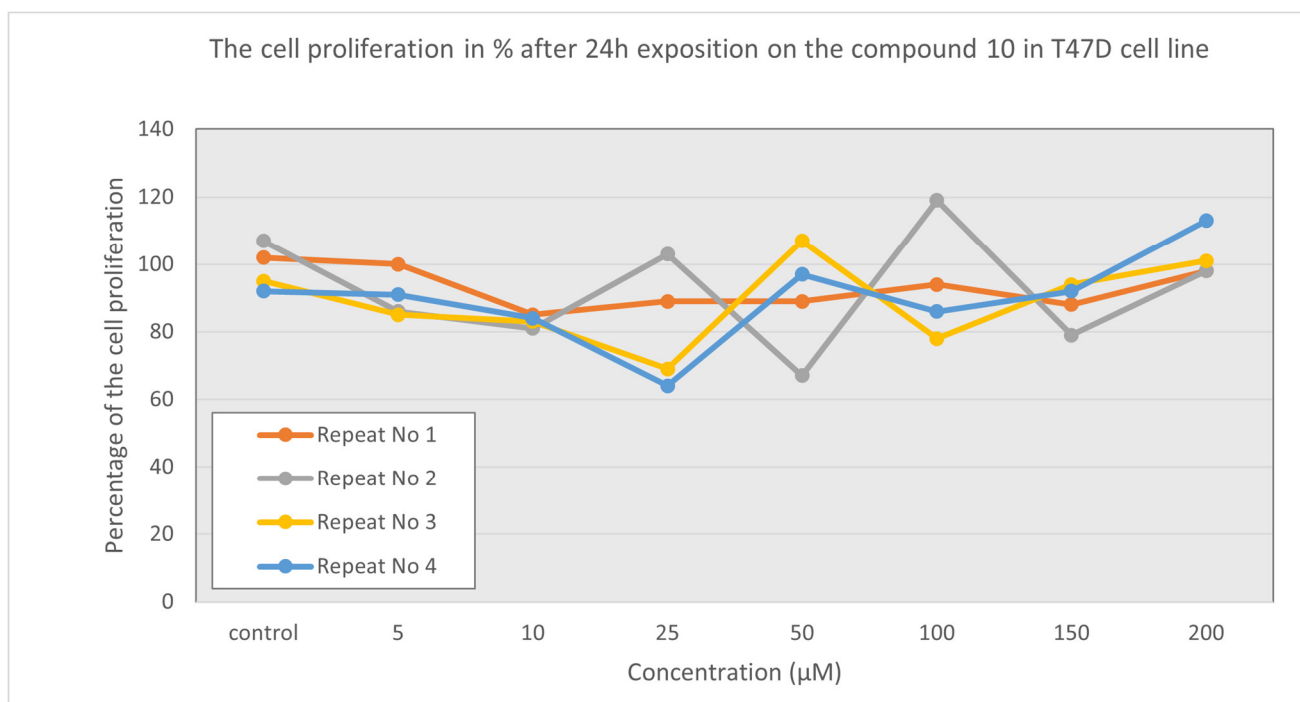



**Figure S15.** The cell proliferation in % after 24h exposition on the compound **21** in T47D cell line

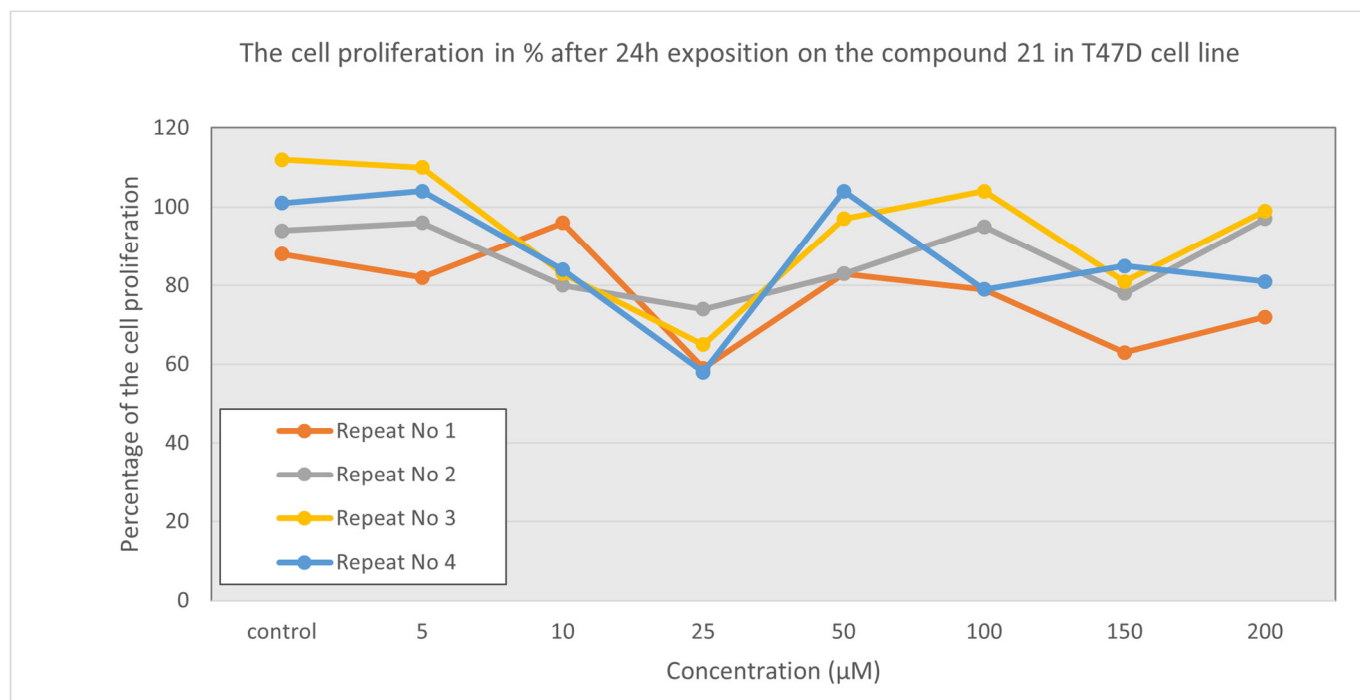

**Figure S16.** The cell proliferation in % after 48h exposition on the compound **7** in T47D cell line

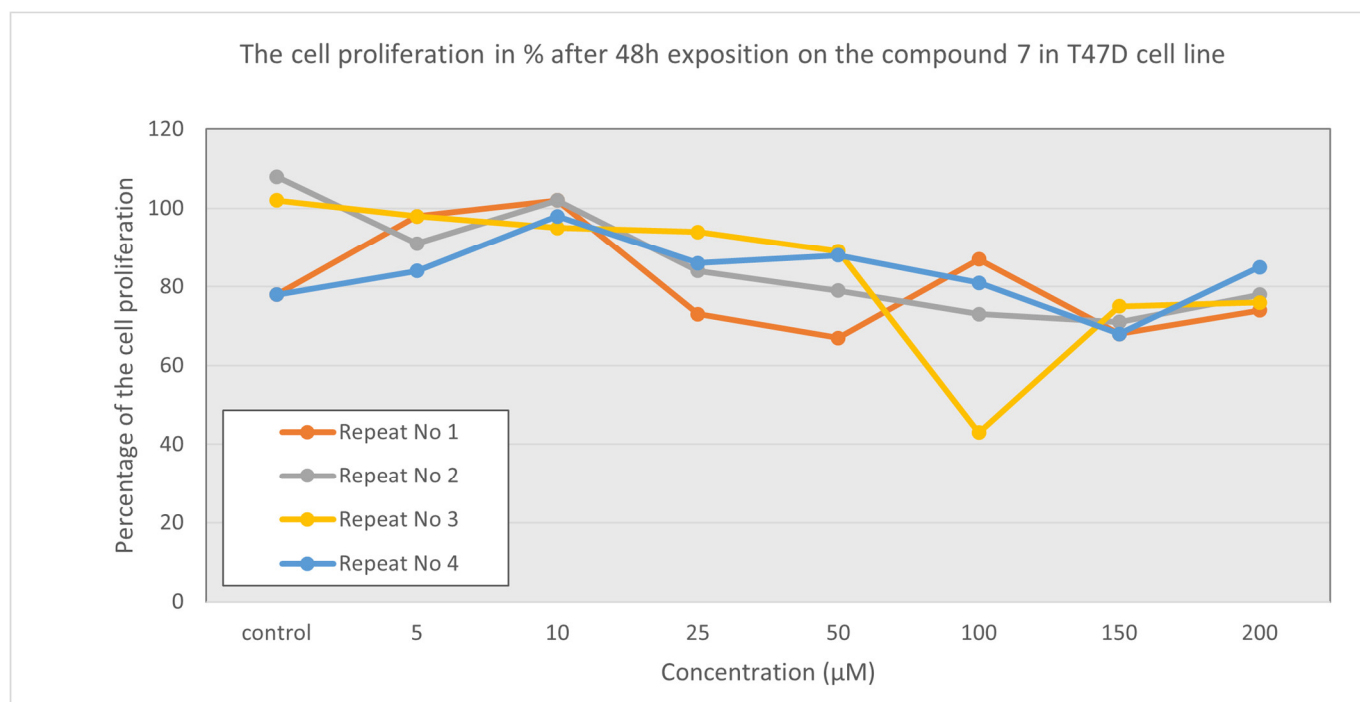

**Figure S17.** The cell proliferation in % after 48h exposition on the compound **10** in T47D cell line

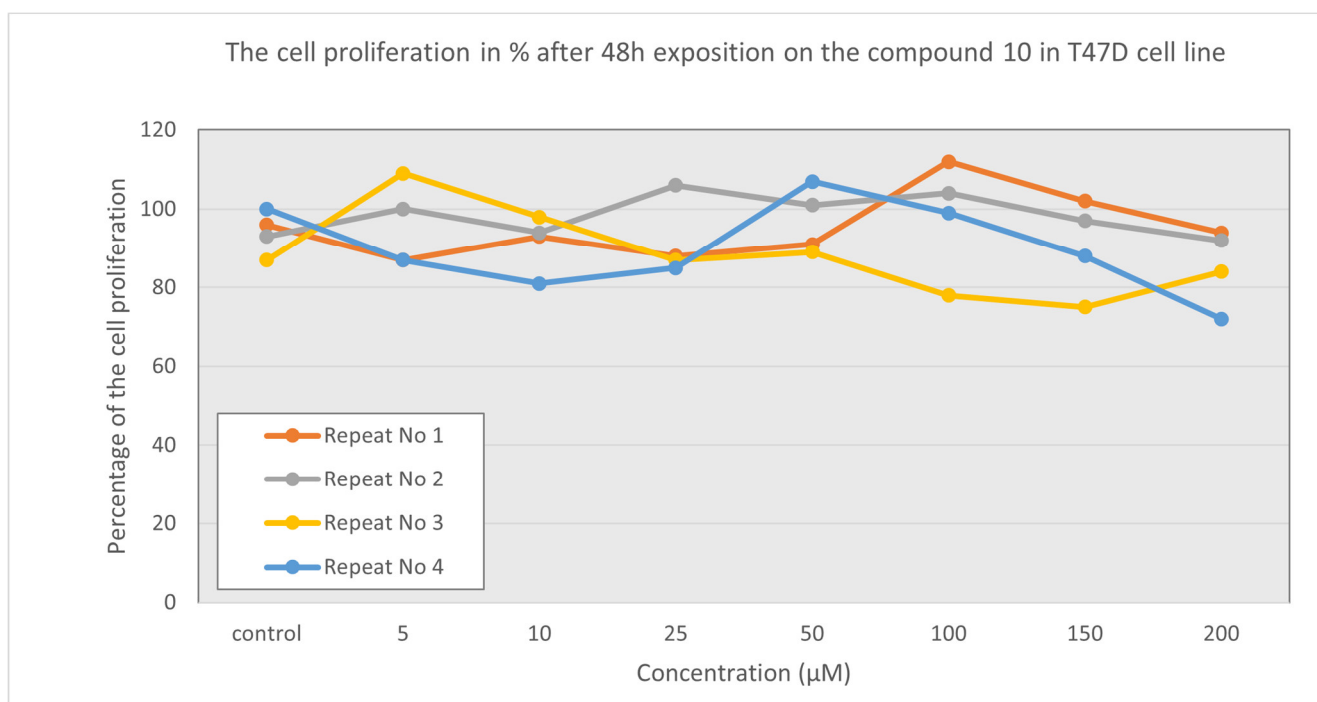

**Figure S18.** The cell proliferation in % after 48h exposition on the compound **21** in T47D cell line

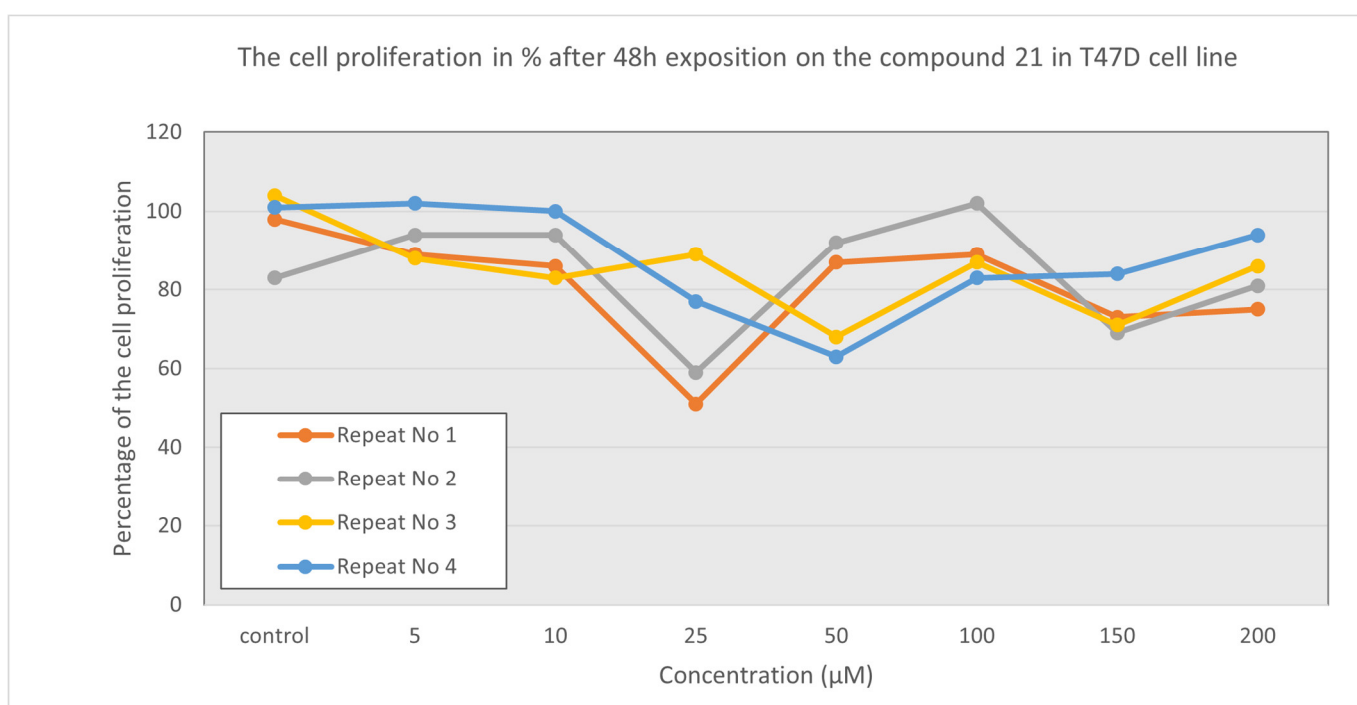

**Figure S19.** The cell proliferation in % after 24h exposition on the compound 7 in HeLa cell line

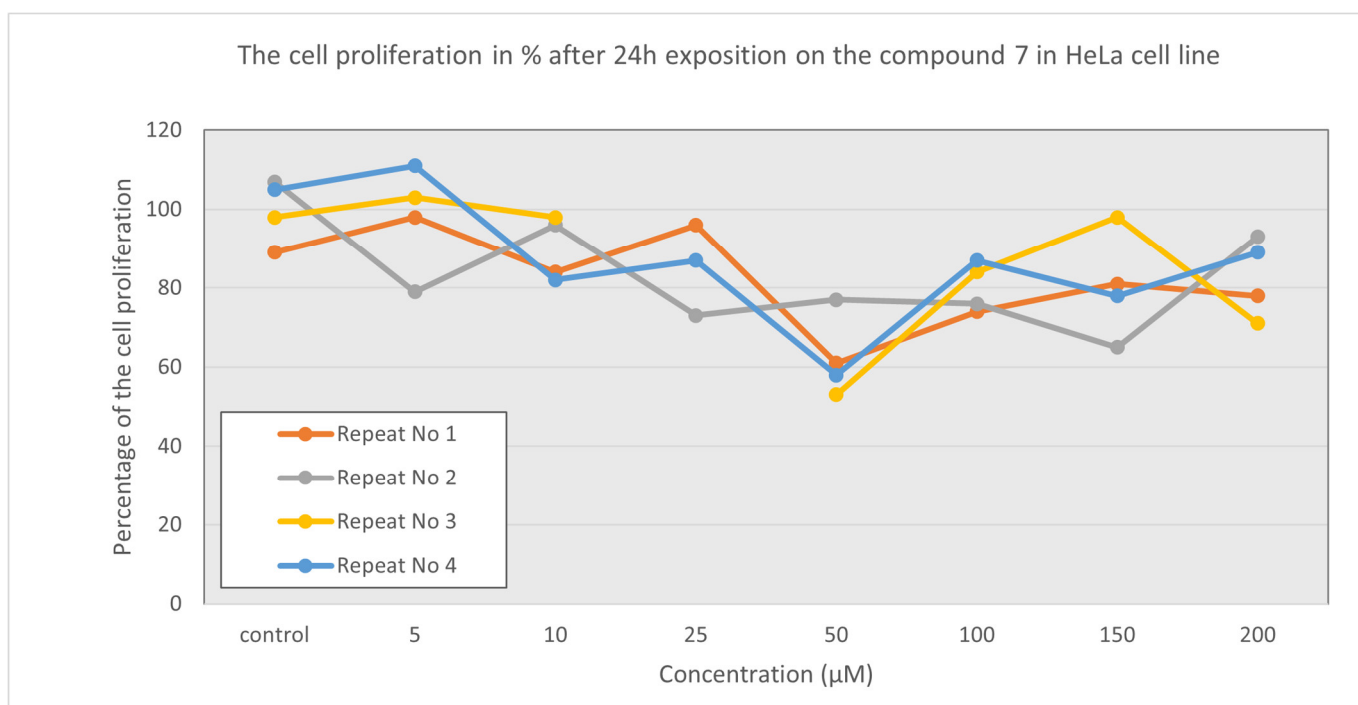

**Figure S20.** The cell proliferation in % after 24h exposition on the compound 10 in HeLa cell line

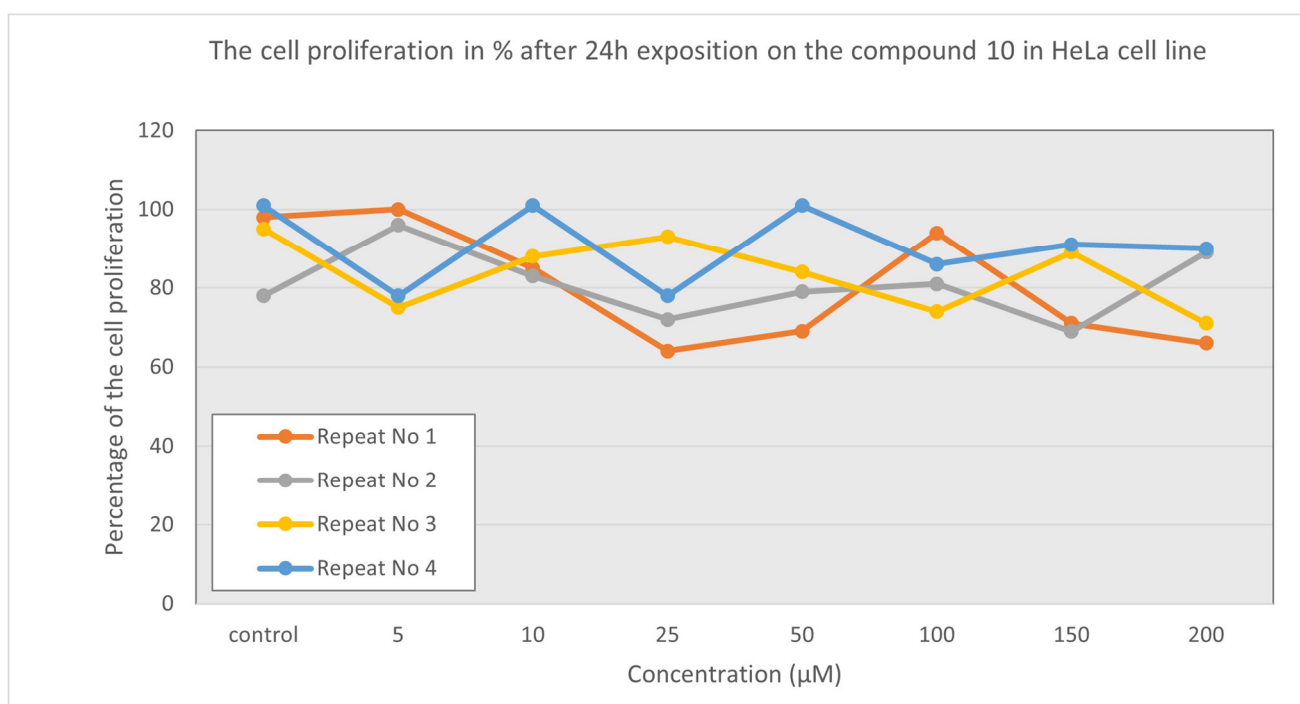

**Figure S21.** The cell proliferation in % after 24h exposition on the compound **21** in HeLa cell line

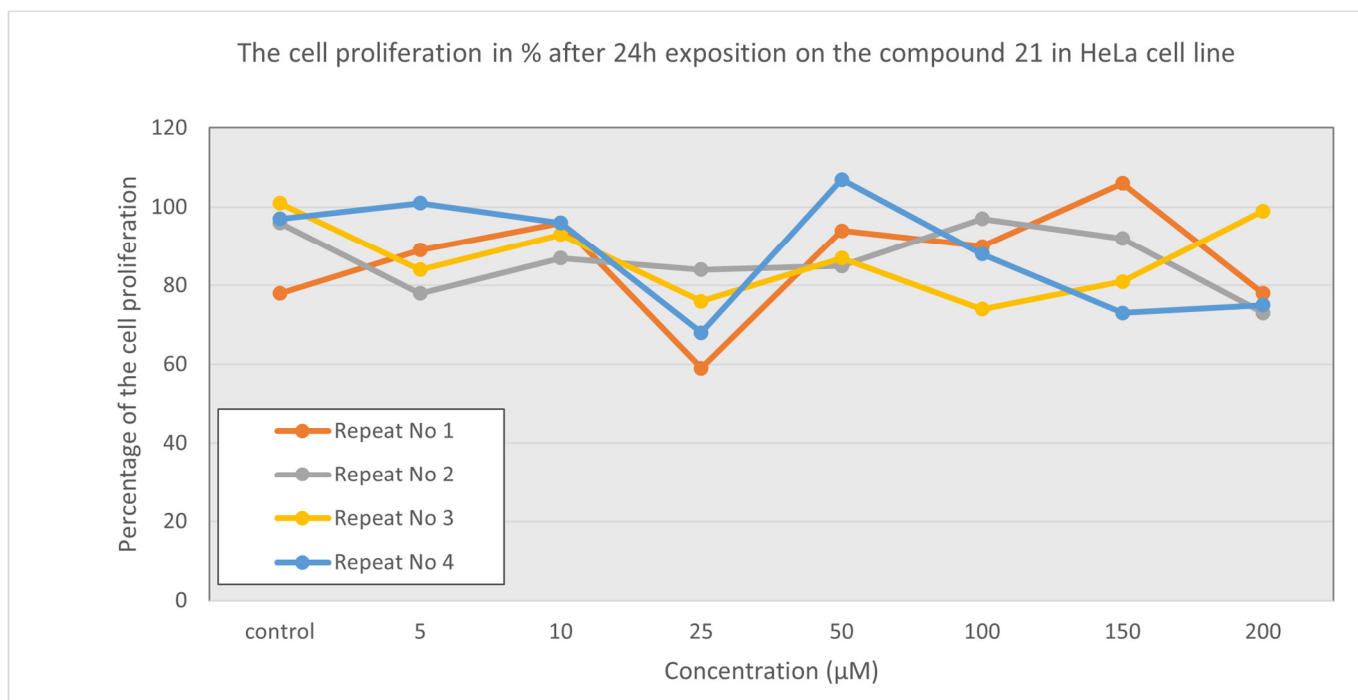

**Figure S22.** The cell proliferation in % after 48h exposition on the compound **7** in HeLa cell line

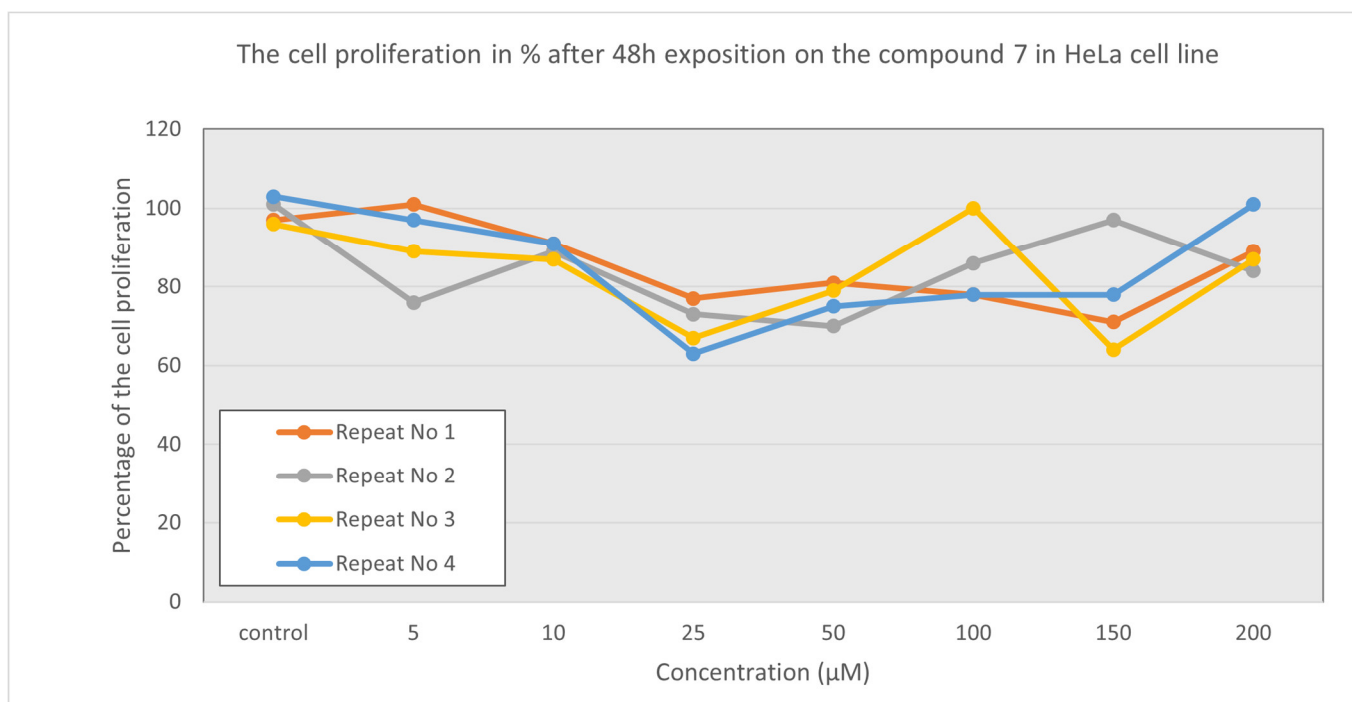

**Figure S23.** The cell proliferation in % after 48h exposition on the compound **10** in HeLa cell line

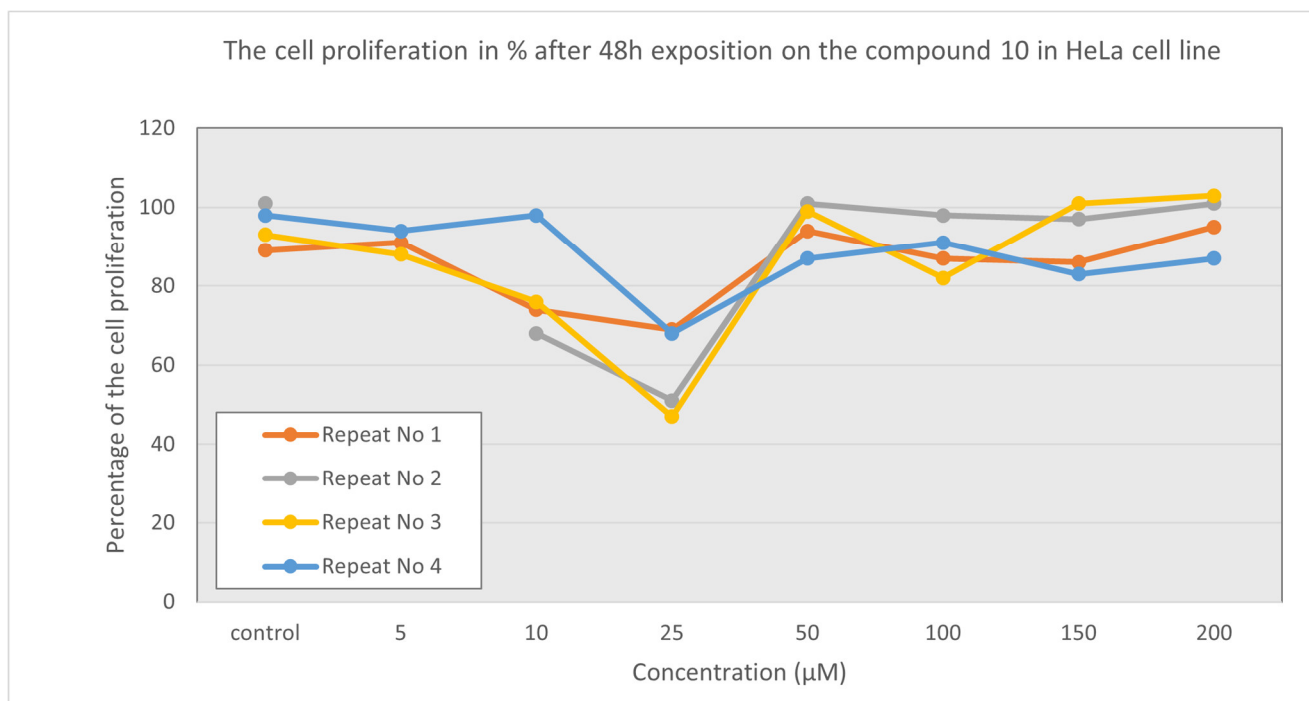

**Figure S24.** The cell proliferation in % after 48h exposition on the compound **21** in HeLa cell line

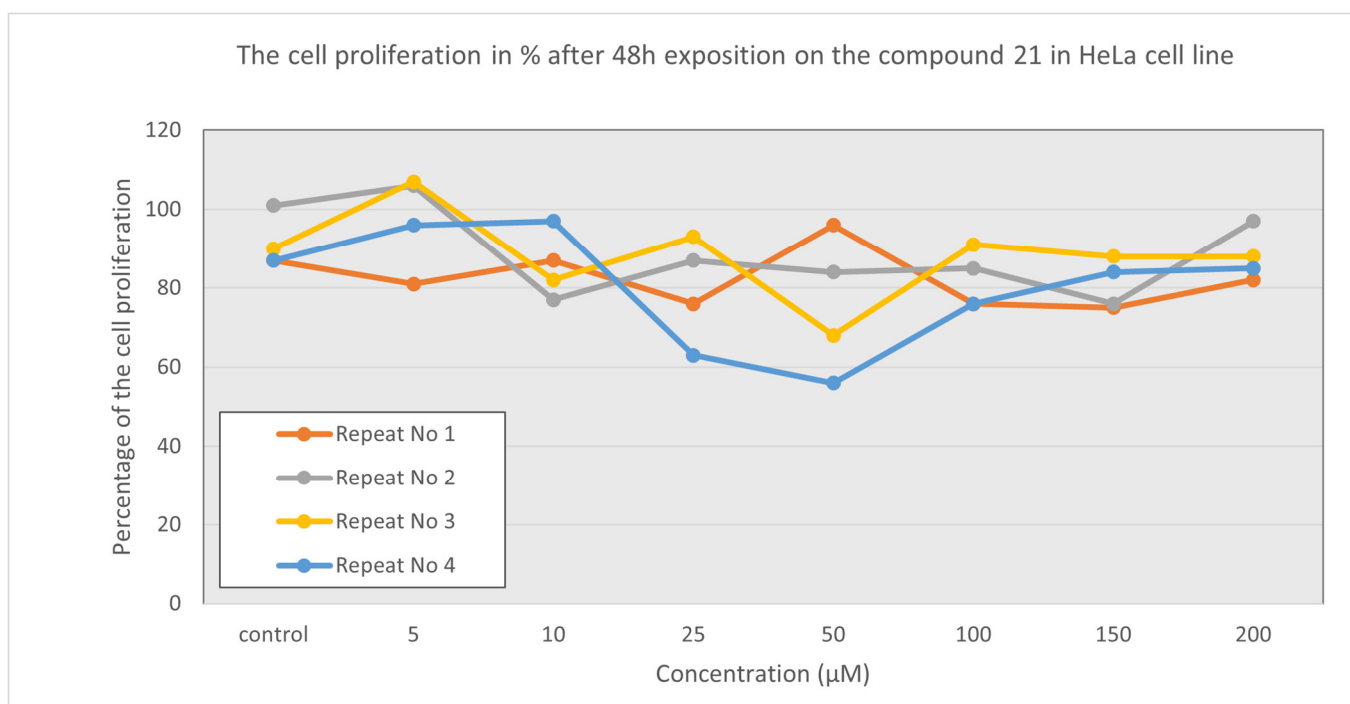

Examples of  $^1\text{H}$  NMR spectra of the synthesized adamantane derivatives:

**Figure S25.** The  $^1\text{H}$  NMR spectrum of the compound 7

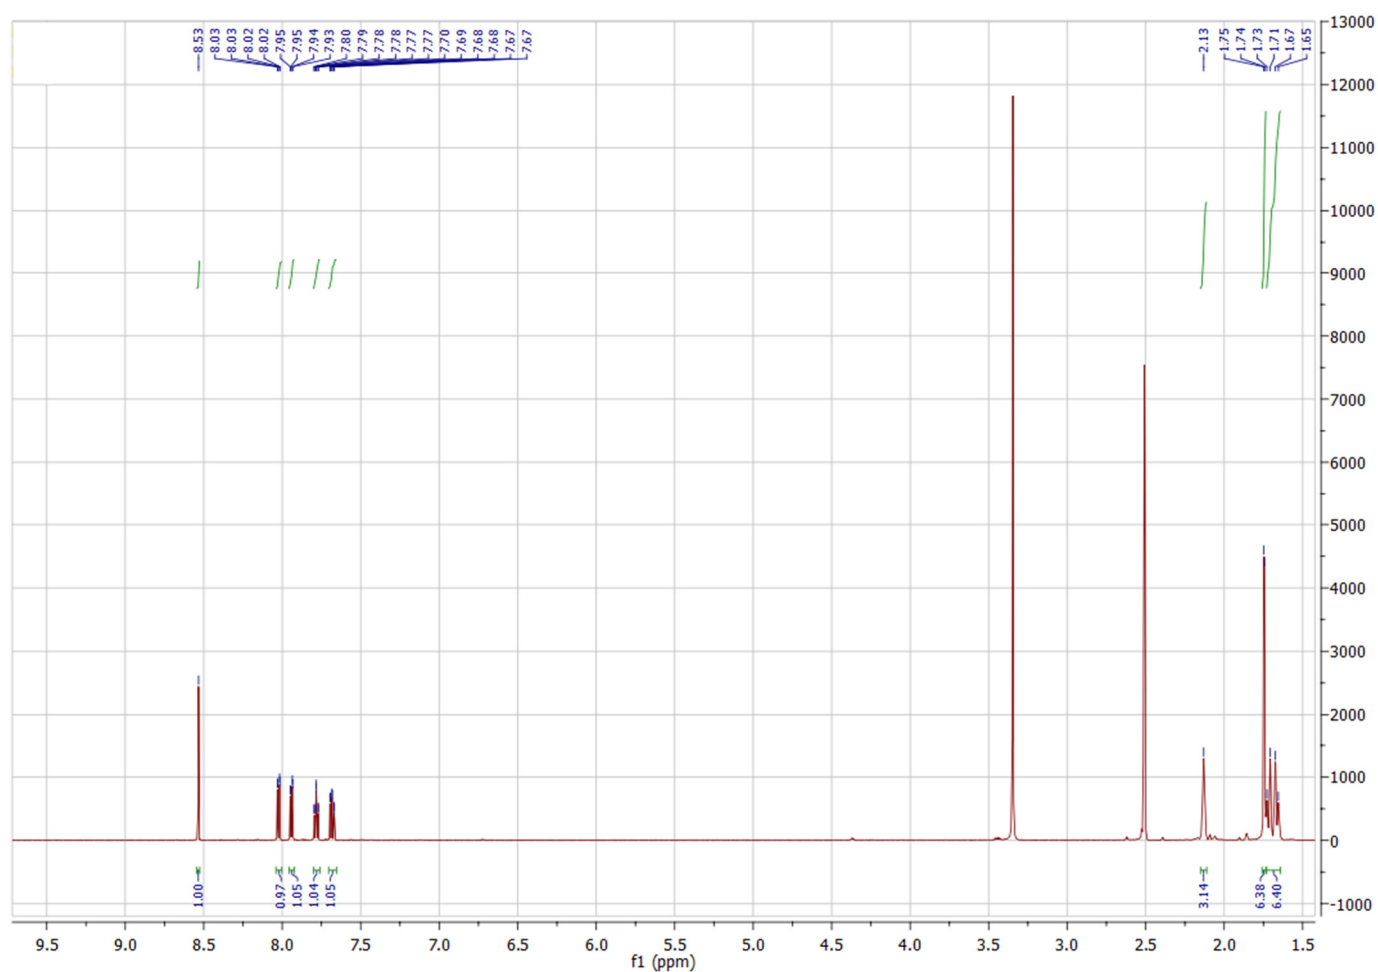

**Figure S26.** The  $^1\text{H}$  NMR spectrum of the compound **8**

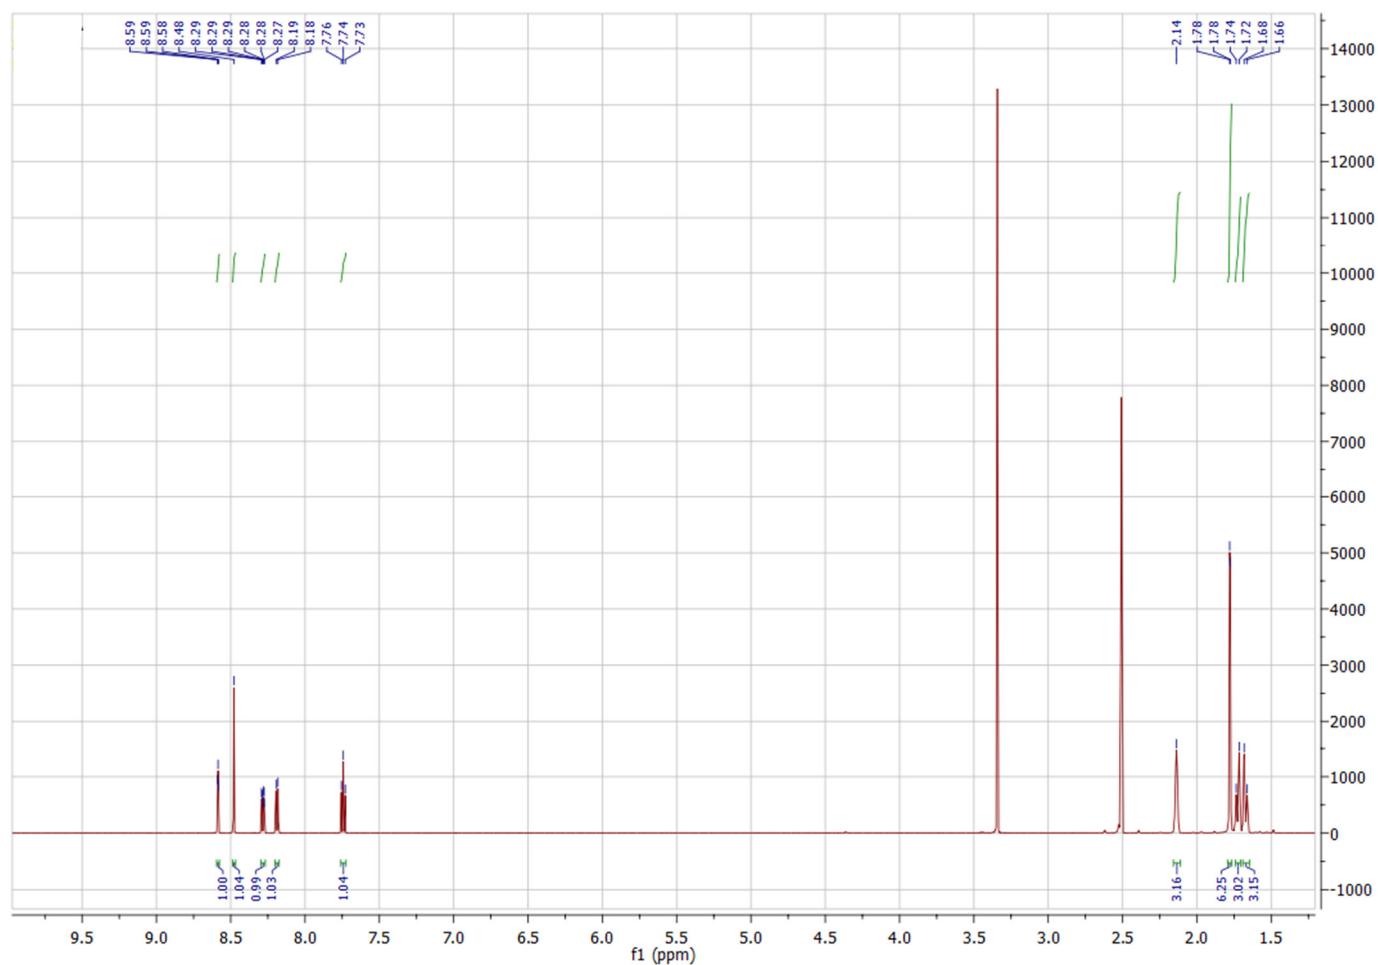

**Figure S27.** The  $^1\text{H}$  NMR spectrum of the compound **15**

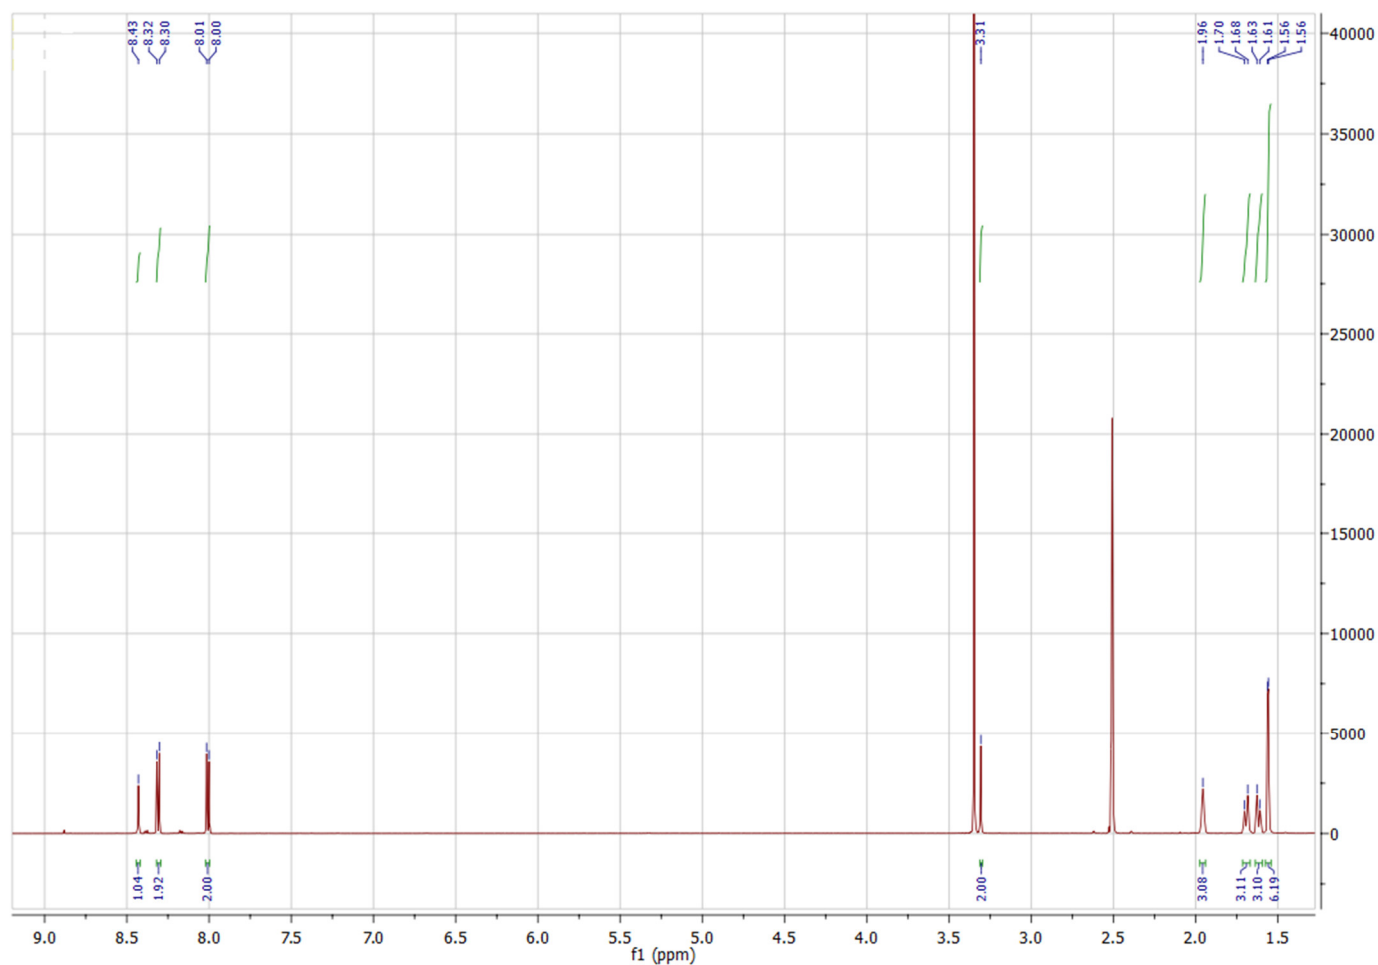

Supplement: s1 [file s1]
